# Supplementary material for: The Role of Incarceration as a Risk Factor for Cognitive Impairment
Source: PubMed Central journal article supplement — J Gerontol B Psychol Sci Soc Sci. 2022 Sep 25;77(12):e247–62. doi: 10.1093/geronb/gbac138 (PMC9799218; doi:10.1093/geronb/gbac138), 2022-09-25
Supplement: gbac138_suppl_supplementary_appendix.pdf [file gbac138_suppl_supplementary_appendix.pdf]

Appendix

Figures

Figure 1

*Theoretical Model for Incarceration and Cognitive Functioning*

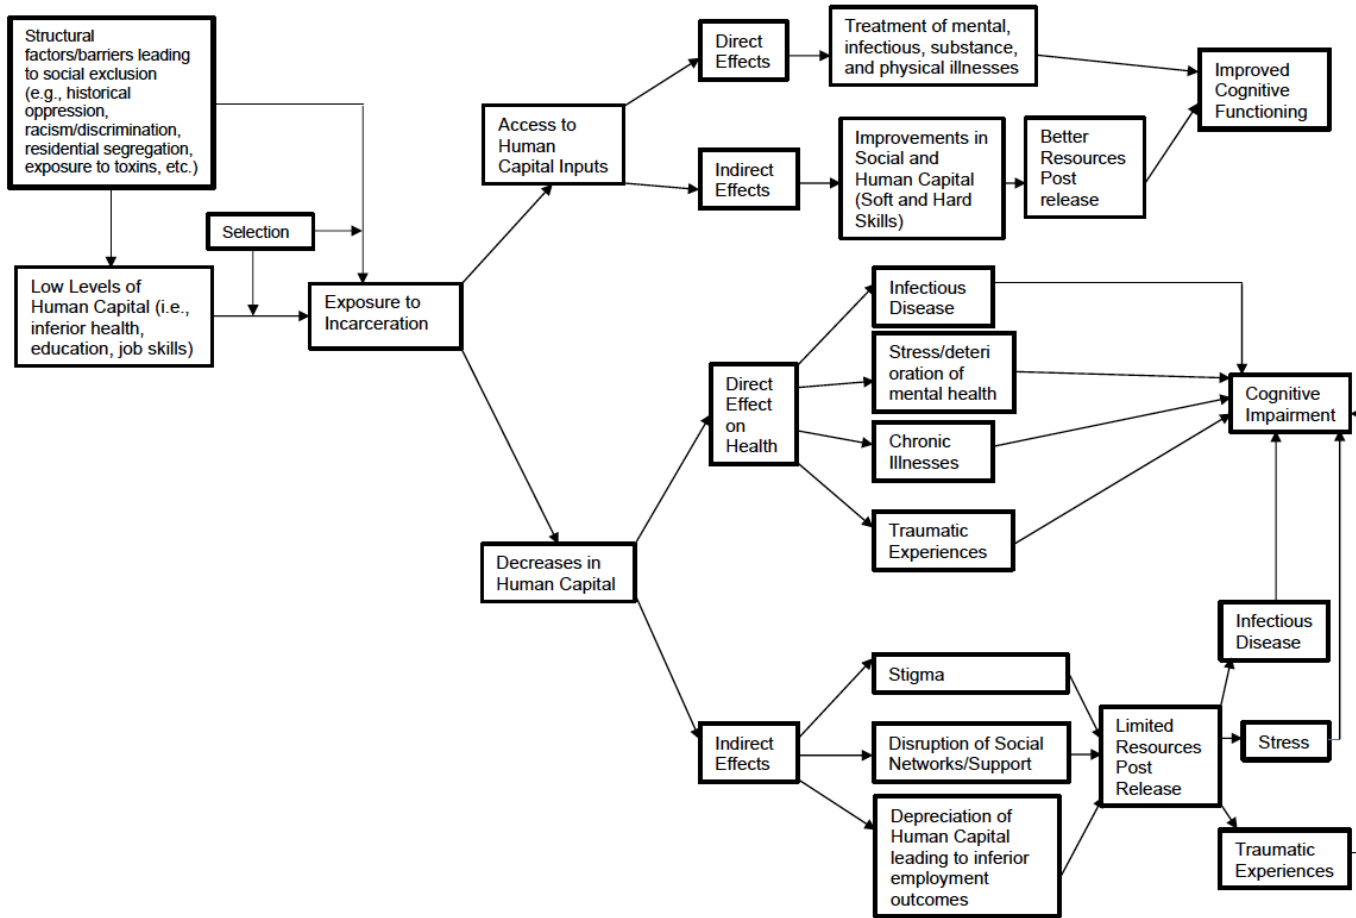

**Figure 2**

*Proportion of Sample Reporting Jail as Type of Residence by Survey Wave*

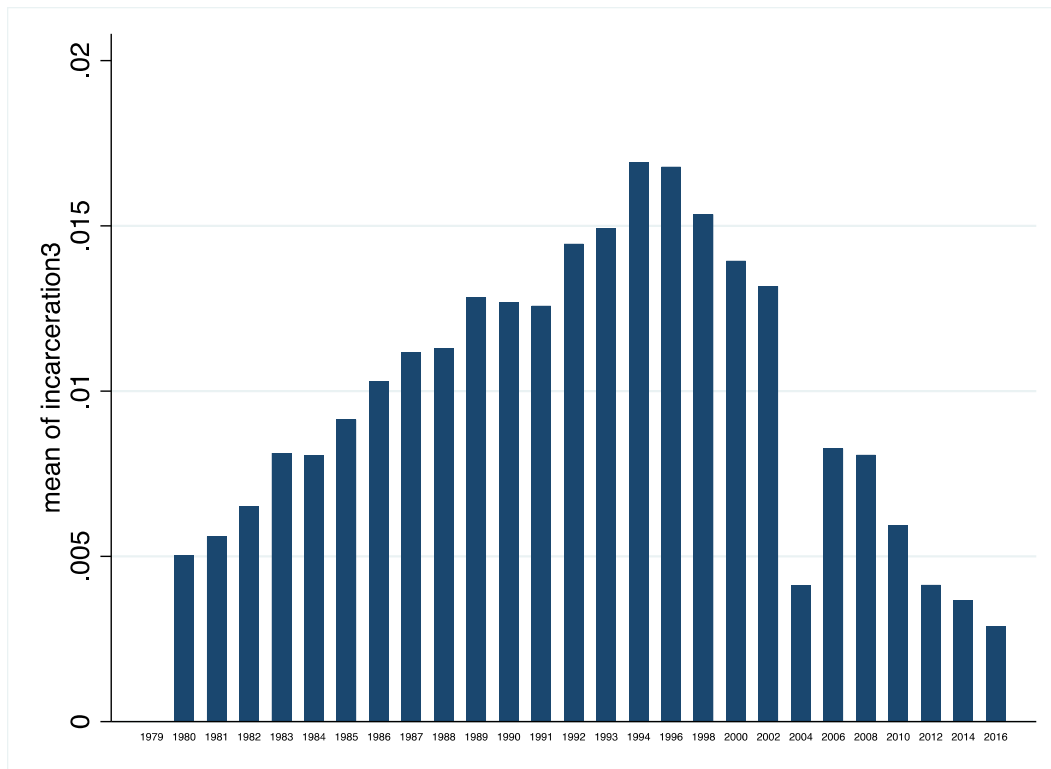

*Notes.* Figure by authors. Figure displays the proportion of individuals whose type of residence is reported as jail in the raw data at the time of the interview for each interview wave for those who took the 48+ Cognition Module. Another question in the 1980 survey wave asked if respondents had “Ever Been Sentenced to Any Type of Correctional Institution?” For those who took the 48+ Cognition Module, 2.2% (N=169) reported a previous incarceration in 1980, with 4.4% (N=352) of the 8,021 individuals missing data for this question.

**Figure 3***TICS-m Score Regressions*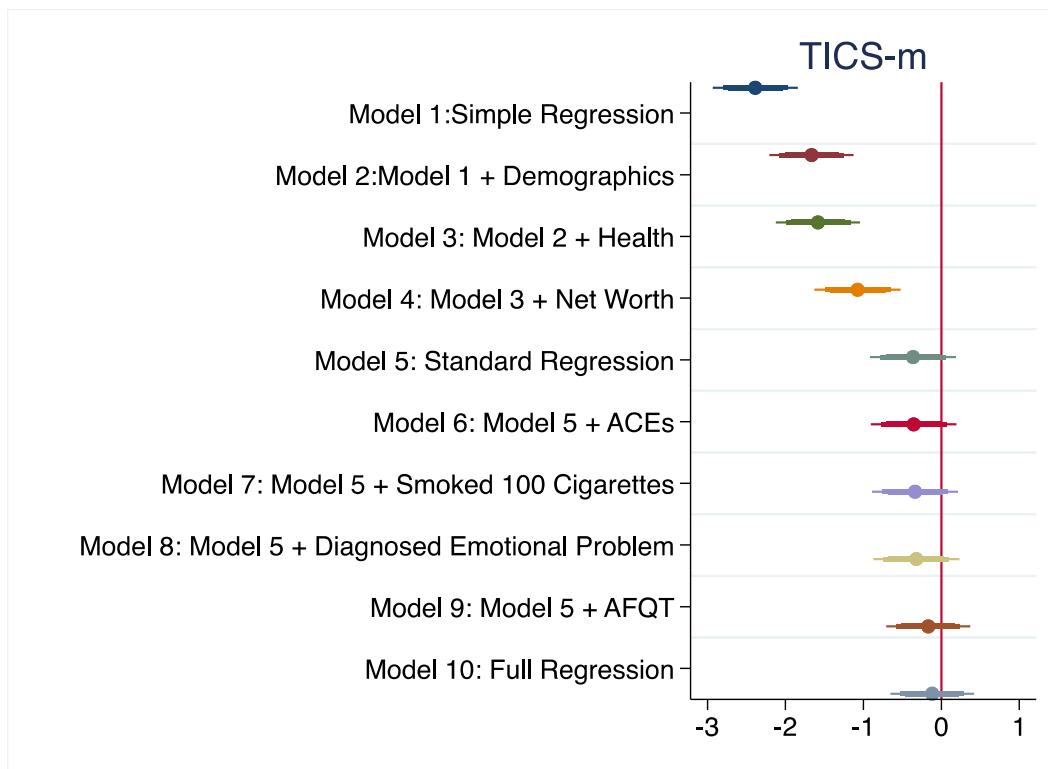

*Note.* Figure by authors. Coefficient plots of coefficients for the prior incarceration variable across the described specifications using ordinary least squares. See Appendix Table 1 for complete results. Adverse childhood experiences (ACEs) variables are from the NLSY childhood health module introduced in 2012. Full regression includes all covariates. All models, except Model 1, include fixed effects for type of city at baseline, region at baseline, and type of city and region at year of 48+ Cognition Module. 99%, 95%, and 90% confidence intervals shown in figures are calculated using robust standard errors.

**Figure 4***Overall Cognitive Impairment Regressions*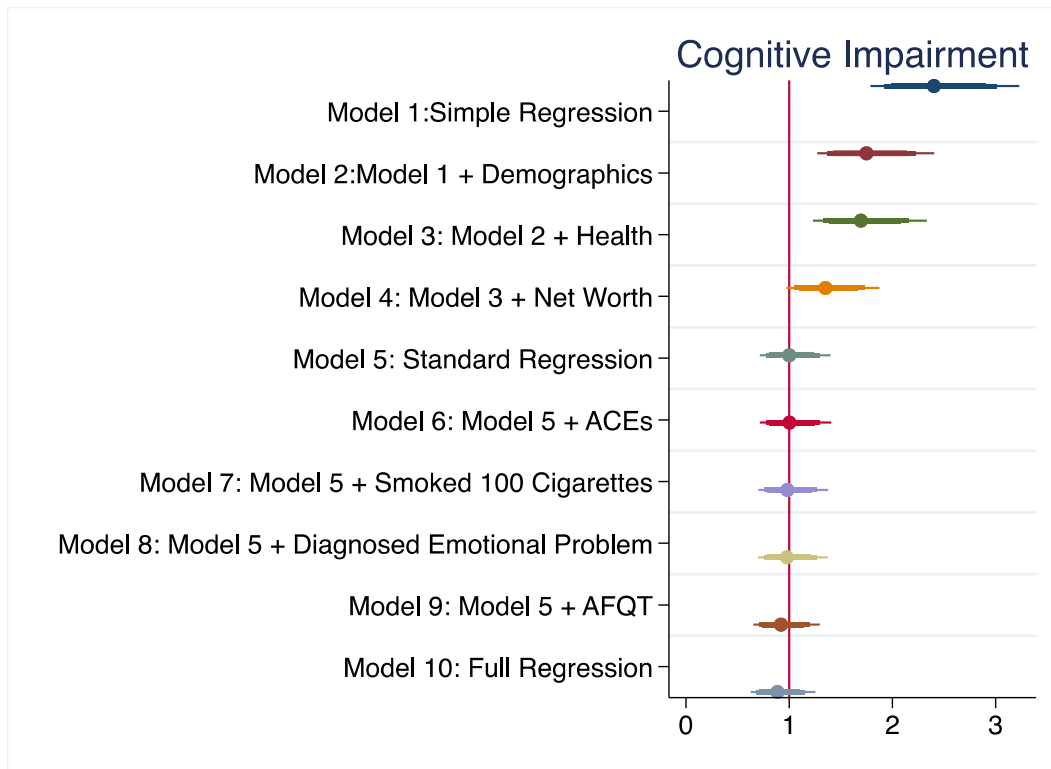

*Note.* Figure by authors. Reported odds ratios (OR) for the prior incarceration variable across the described specifications estimated logistic regression. See Appendix Table 2 for complete results. Adverse childhood experience (ACEs) variables are from the NLSY childhood health module introduced in 2012. Full regression includes all covariates. All models, except Model 1, include fixed effects for type of city at baseline, region at baseline, and type of city and region at year of 48+ Cognition Module. 99%, 95%, and 90% confidence intervals shown in figures are calculated using robust standard errors.

**Figure 5***Generalized Ordered Logit Regressions*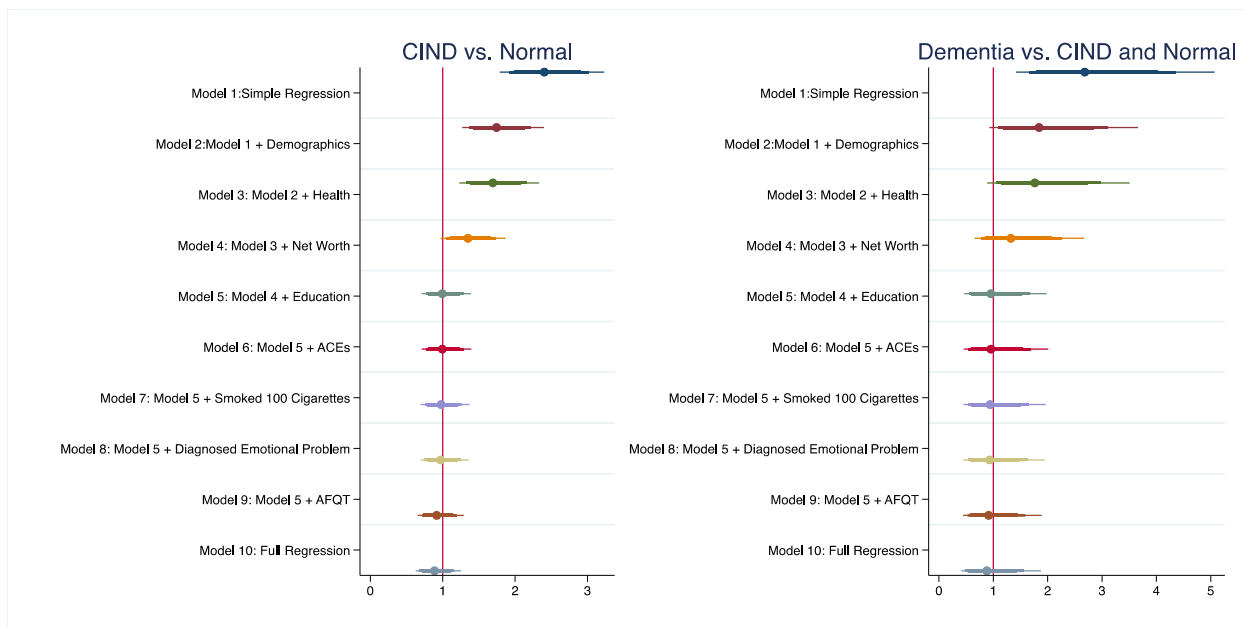

*Note.* Figure by authors. Reported odds ratios (OR) for the prior incarceration variable across the described specifications estimated generalized ordered logit. See Appendix Table 3 for complete results. Adverse childhood experiences (ACEs) variables are from the NLSY childhood health module introduced in 2012. Full regression includes all covariates. All models, except Model 1, include fixed effects for type of city at baseline, region at baseline, and type of city and region at year of 48+ Cognition Module. 99%, 95%, and 90% confidence intervals shown in figures are calculated using robust standard errors.

## Tables

Table 1

*TICS-m Regressions*

|                                                     | Simple               |                      | Standard Regressors  |                      |                      |                      | Augmented Regressors |                      |                      |                      |
|-----------------------------------------------------|----------------------|----------------------|----------------------|----------------------|----------------------|----------------------|----------------------|----------------------|----------------------|----------------------|
|                                                     | (1)                  | (2)                  | (3)                  | (4)                  | (5)                  | (6)                  | (7)                  | (8)                  | (9)                  | (10)                 |
| Incarcerated prior to<br>Cognition Survey           | -2.457***<br>(0.211) | -1.665***<br>(0.209) | -1.583***<br>(0.210) | -1.075***<br>(0.214) | -0.363+<br>(0.214)   | -0.355+<br>(0.213)   | -0.337<br>(0.214)    | -0.321<br>(0.214)    | -0.168<br>(0.209)    | -0.118<br>(0.208)    |
| Incarcerated in the year of the<br>Cognition Survey | 0.116<br>(0.719)     | 0.466<br>(0.708)     | 0.475<br>(0.687)     | 0.733<br>(0.668)     | 0.759<br>(0.659)     | 0.615<br>(0.664)     | 0.764<br>(0.659)     | 0.769<br>(0.660)     | 0.753<br>(0.646)     | 0.653<br>(0.649)     |
| Age at Interview                                    |                      | -0.085**<br>(0.030)  | -0.083**<br>(0.029)  | -0.076*<br>(0.030)   | -0.076**<br>(0.029)  | -0.081**<br>(0.029)  | -0.075**<br>(0.029)  | -0.075**<br>(0.029)  | -0.063*<br>(0.028)   | -0.067*<br>(0.028)   |
| Non-Hispanic Black                                  |                      | -2.318***<br>(0.124) | -2.257***<br>(0.127) | -1.740***<br>(0.130) | -1.594***<br>(0.125) | -1.552***<br>(0.126) | -1.605***<br>(0.125) | -1.650***<br>(0.126) | -0.306*<br>(0.131)   | -0.345***<br>(0.132) |
| Hispanic                                            |                      | -2.179***<br>(0.145) | -2.221***<br>(0.146) | -1.872***<br>(0.145) | -1.406***<br>(0.139) | -1.365***<br>(0.139) | -1.418***<br>(0.140) | -1.436***<br>(0.140) | -0.521***<br>(0.136) | -0.539***<br>(0.137) |
| Female                                              |                      | 0.632***<br>(0.102)  | 0.692***<br>(0.103)  | 0.749***<br>(0.103)  | 0.623***<br>(0.099)  | 0.623***<br>(0.100)  | 0.621***<br>(0.099)  | 0.681***<br>(0.100)  | 0.826***<br>(0.095)  | 0.894***<br>(0.097)  |
| <i>BMI</i>                                          |                      |                      |                      |                      |                      |                      |                      |                      |                      |                      |
| Underweight: BMI<18.5                               |                      |                      | -1.456*<br>(0.608)   | -1.150+<br>(0.595)   | -0.748<br>(0.559)    | -0.696<br>(0.553)    | -0.750<br>(0.558)    | -0.726<br>(0.556)    | -0.813<br>(0.546)    | -0.755<br>(0.535)    |
| Overweight: 25 ≤ BMI < 30                           |                      |                      | 0.389**<br>(0.131)   | 0.429***<br>(0.128)  | 0.433***<br>(0.124)  | 0.433***<br>(0.124)  | 0.425***<br>(0.124)  | 0.433***<br>(0.124)  | 0.446***<br>(0.120)  | 0.447***<br>(0.120)  |
| Obese: BMI ≥ 30                                     |                      |                      | 0.424**<br>(0.143)   | 0.567***<br>(0.142)  | 0.596***<br>(0.136)  | 0.600***<br>(0.136)  | 0.584***<br>(0.137)  | 0.604***<br>(0.136)  | 0.598***<br>(0.129)  | 0.610***<br>(0.129)  |

*Reported diagnoses by:*

|                            | Simple |     | Standard Regressors  |                      |                      |                      | Augmented Regressors |                      |                      |                      |
|----------------------------|--------|-----|----------------------|----------------------|----------------------|----------------------|----------------------|----------------------|----------------------|----------------------|
|                            | (1)    | (2) | (3)                  | (4)                  | (5)                  | (6)                  | (7)                  | (8)                  | (9)                  | (10)                 |
| <i>Health 50+ survey</i>   |        |     |                      |                      |                      |                      |                      |                      |                      |                      |
| Heart problems             |        |     | -0.388*<br>(0.195)   | -0.218<br>(0.190)    | -0.081<br>(0.187)    | -0.045<br>(0.187)    | -0.076<br>(0.187)    | -0.003<br>(0.188)    | -0.076<br>(0.178)    | 0.035<br>(0.179)     |
| High blood pressure        |        |     | -0.561***<br>(0.113) | -0.515***<br>(0.112) | -0.455***<br>(0.107) | -0.452***<br>(0.107) | -0.452***<br>(0.107) | -0.436***<br>(0.107) | -0.459***<br>(0.104) | -0.432***<br>(0.104) |
| Diabetes                   |        |     | -0.331*<br>(0.153)   | -0.229<br>(0.150)    | -0.246+<br>(0.143)   | -0.226<br>(0.143)    | -0.247+<br>(0.143)   | -0.210<br>(0.143)    | -0.233+<br>(0.137)   | -0.183<br>(0.137)    |
| Stroke                     |        |     | -1.013**<br>(0.318)  | -0.759*<br>(0.322)   | -0.502<br>(0.305)    | -0.469<br>(0.303)    | -0.494<br>(0.305)    | -0.440<br>(0.306)    | -0.400<br>(0.294)    | -0.312<br>(0.293)    |
| <i>Net Worth</i>           |        |     |                      |                      |                      |                      |                      |                      |                      |                      |
| 1st Quartile               |        |     |                      | -2.465***<br>(0.211) | -1.439***<br>(0.214) | -1.409***<br>(0.213) | -1.420***<br>(0.216) | -1.377***<br>(0.215) | -0.976***<br>(0.208) | -0.885***<br>(0.209) |
| 2nd Quartile               |        |     |                      | -1.560***<br>(0.169) | -0.687***<br>(0.171) | -0.691***<br>(0.170) | -0.671***<br>(0.172) | -0.655***<br>(0.171) | -0.332*<br>(0.165)   | -0.302+<br>(0.166)   |
| 3rd Quartile               |        |     |                      | -0.481**<br>(0.164)  | -0.104<br>(0.156)    | -0.119<br>(0.156)    | -0.095<br>(0.157)    | -0.090<br>(0.156)    | 0.063<br>(0.154)     | 0.067<br>(0.153)     |
| <i>Education</i>           |        |     |                      |                      |                      |                      |                      |                      |                      |                      |
| HGC < 12 years             |        |     |                      |                      | -3.687***<br>(0.182) | -3.599***<br>(0.183) | -3.651***<br>(0.184) | -3.672***<br>(0.182) | -1.372***<br>(0.200) | -1.303***<br>(0.199) |
| HGC = 12 years             |        |     |                      |                      | -2.259***<br>(0.131) | -2.204***<br>(0.131) | -2.238***<br>(0.131) | -2.266***<br>(0.131) | -0.607***<br>(0.140) | -0.585***<br>(0.140) |
| 12 < HGC < 16 years        |        |     |                      |                      | -0.995***<br>(0.133) | -0.977***<br>(0.133) | -0.979***<br>(0.133) | -0.993***<br>(0.133) | -0.058<br>(0.135)    | -0.049<br>(0.135)    |
| <b>Augmented variables</b> |        |     |                      |                      |                      |                      |                      |                      |                      |                      |
| <i>ACEs</i>                |        |     |                      |                      |                      |                      |                      |                      |                      |                      |
| Fair or poor health        |        |     |                      |                      |                      | -1.129***<br>(0.229) |                      |                      |                      | -0.946***<br>(0.219) |

|                                                         | Simple |      |      | Standard Regressors |      |                    | Augmented Regressors |                      |                     |                      |
|---------------------------------------------------------|--------|------|------|---------------------|------|--------------------|----------------------|----------------------|---------------------|----------------------|
|                                                         | (1)    | (2)  | (3)  | (4)                 | (5)  | (6)                | (7)                  | (8)                  | (9)                 | (10)                 |
| Hospitalized $\geq$ 2 weeks                             |        |      |      |                     |      | 0.065<br>(0.201)   |                      |                      |                     | 0.198<br>(0.191)     |
| Confined to home or bed for $\geq$ 4 weeks              |        |      |      |                     |      | -0.269<br>(0.248)  |                      |                      |                     | -0.145<br>(0.239)    |
| Lived with someone depressed, mentally ill, or suicidal |        |      |      |                     |      | 0.609**<br>(0.189) |                      |                      |                     | 0.533**<br>(0.186)   |
| Lived with problem drinker or alcoholic                 |        |      |      |                     |      | 0.043<br>(0.135)   |                      |                      |                     | -0.028<br>(0.128)    |
| Physically harmed by parent or adult more than once     |        |      |      |                     |      | 0.246<br>(0.169)   |                      |                      |                     | 0.279+<br>(0.161)    |
| Little to no love from parent                           |        |      |      |                     |      | -0.309*<br>(0.136) |                      |                      |                     | -0.159<br>(0.132)    |
| Smoked at least 100 cigarettes in lifetime              |        |      |      |                     |      |                    | -0.123<br>(0.101)    |                      |                     | -0.025<br>(0.097)    |
| Emotional disorder or depression                        |        |      |      |                     |      |                    |                      | -0.428***<br>(0.129) |                     | -0.542***<br>(0.127) |
| 1980 Armed Forces Qualification Test Score              |        |      |      |                     |      |                    |                      |                      | 0.056***<br>(0.002) | 0.055***<br>(0.002)  |
| N                                                       | 8021   | 8021 | 8021 | 8021                | 8021 | 8021               | 8021                 | 8021                 | 8021                | 8021                 |
| N (FD)                                                  | 573    | 573  | 573  | 573                 | 573  | 573                | 573                  | 573                  | 573                 | 573                  |
| N (ND)                                                  | 7448   | 7448 | 7448 | 7448                | 7448 | 7448               | 7448                 | 7448                 | 7448                | 7448                 |

*Note.* Marginal effects with robust standard errors in parentheses. Missing data imputed using multiple imputation by chained equations. All models except the simple regression include fixed effects for type of city at baseline, region at baseline, type of city at year of survey, and region at year of survey.

+  $p < 0.10$ , \*  $p < 0.05$ , \*\*  $p < .01$ , \*\*\*  $p < .001$



Table 2

*Logistic Regressions for Cognitive Impairment*

|                                                  | Simple              |                     |                     |                     |                     | Standard Regressors |                     |                     |                     |                   | Augmented Regressors |      |      |      |      |
|--------------------------------------------------|---------------------|---------------------|---------------------|---------------------|---------------------|---------------------|---------------------|---------------------|---------------------|-------------------|----------------------|------|------|------|------|
|                                                  | (1)                 | (2)                 | (3)                 | (4)                 | (5)                 | (6)                 | (7)                 | (8)                 | (9)                 | (10)              | (11)                 | (12) | (13) | (14) | (15) |
| Incarcerated prior to Cognition Survey           | 2.402***<br>(0.275) | 1.748***<br>(0.216) | 1.694***<br>(0.210) | 1.351*<br>(0.171)   | 1.001<br>(0.131)    | 1.003<br>(0.131)    | 0.983<br>(0.129)    | 0.978<br>(0.128)    | 0.920<br>(0.122)    | 0.887<br>(0.119)  |                      |      |      |      |      |
| Incarcerated in the year of the Cognition Survey | 1.127<br>(0.375)    | 0.962<br>(0.329)    | 0.979<br>(0.335)    | 0.889<br>(0.298)    | 0.887<br>(0.310)    | 0.955<br>(0.334)    | 0.884<br>(0.308)    | 0.881<br>(0.310)    | 0.902<br>(0.318)    | 0.950<br>(0.334)  |                      |      |      |      |      |
| Age at Interview                                 | 1.041*<br>(0.019)   | 1.039*<br>(0.019)   | 1.037*<br>(0.019)   | 1.037+<br>(0.020)   | 1.041*<br>(0.020)   | 1.045*<br>(0.020)   | 1.041*<br>(0.020)   | 1.041*<br>(0.020)   | 1.037+<br>(0.021)   | 1.040+<br>(0.021) |                      |      |      |      |      |
| Non-Hispanic Black                               | 3.366***<br>(0.301) | 3.352***<br>(0.308) | 2.662***<br>(0.252) | 2.662***<br>(0.252) | 2.562***<br>(0.247) | 2.495***<br>(0.242) | 2.586***<br>(0.248) | 2.638***<br>(0.255) | 1.258*<br>(0.129)   | 1.288*<br>(0.134) |                      |      |      |      |      |
| Hispanic                                         | 2.971***<br>(0.305) | 3.111***<br>(0.325) | 2.668***<br>(0.284) | 2.202***<br>(0.241) | 2.135***<br>(0.235) | 2.227***<br>(0.244) | 2.238***<br>(0.245) | 1.311*<br>(0.151)   | 1.323*<br>(0.153)   |                   |                      |      |      |      |      |
| Female                                           | 0.794**<br>(0.059)  | 0.756***<br>(0.057) | 0.733***<br>(0.056) | 0.781**<br>(0.061)  | 0.785**<br>(0.063)  | 0.784**<br>(0.062)  | 0.758***<br>(0.061) | 0.699***<br>(0.056) | 0.683***<br>(0.057) |                   |                      |      |      |      |      |
| <i>BMI</i>                                       |                     |                     |                     |                     |                     |                     |                     |                     |                     |                   |                      |      |      |      |      |
| Underweight: BMI < 18.5                          | 1.370<br>(0.496)    | 1.171<br>(0.441)    | 0.943<br>(0.377)    | 0.905<br>(0.363)    | 0.945<br>(0.377)    | 0.936<br>(0.373)    | 1.010<br>(0.430)    | 1.000<br>(0.422)    |                     |                   |                      |      |      |      |      |
| Overweight: 25 ≤ BMI < 30                        | 0.669***<br>(0.064) | 0.660***<br>(0.064) | 0.662***<br>(0.065) | 0.658***<br>(0.065) | 0.667***<br>(0.065) | 0.664***<br>(0.065) | 0.651***<br>(0.066) | 0.655***<br>(0.067) |                     |                   |                      |      |      |      |      |
| Obese: BMI ≥ 30                                  | 0.654***<br>(0.069) | 0.621***<br>(0.066) | 0.622***<br>(0.067) | 0.620***<br>(0.067) | 0.630***<br>(0.068) | 0.623***<br>(0.067) | 0.613***<br>(0.067) | 0.619***<br>(0.068) |                     |                   |                      |      |      |      |      |
| <i>Reported diagnoses by Health 50+ survey</i>   |                     |                     |                     |                     |                     |                     |                     |                     |                     |                   |                      |      |      |      |      |
| Heart problems                                   | 1.078<br>(0.139)    | 0.993<br>(0.129)    | 0.924<br>(0.123)    | 0.909<br>(0.123)    | 0.919<br>(0.123)    | 0.887<br>(0.120)    | 0.920<br>(0.127)    | 0.870<br>(0.124)    |                     |                   |                      |      |      |      |      |

|                             | Simple |     |                     | Standard Regressors |                     |                     | Augmented Regressors |                     |                    |                    |
|-----------------------------|--------|-----|---------------------|---------------------|---------------------|---------------------|----------------------|---------------------|--------------------|--------------------|
|                             | (1)    | (2) | (3)                 | (4)                 | (5)                 | (6)                 | (7)                  | (8)                 | (9)                | (10)               |
| High blood pressure         |        |     | 1.329***<br>(0.110) | 1.308**<br>(0.109)  | 1.284**<br>(0.110)  | 1.287**<br>(0.110)  | 1.282**<br>(0.110)   | 1.269**<br>(0.108)  | 1.294**<br>(0.113) | 1.278**<br>(0.112) |
| Diabetes                    |        |     | 1.290*<br>(0.133)   | 1.232*<br>(0.127)   | 1.251*<br>(0.131)   | 1.237*<br>(0.131)   | 1.251*<br>(0.131)    | 1.232*<br>(0.129)   | 1.230+<br>(0.131)  | 1.202+<br>(0.129)  |
| Stroke                      |        |     | 1.665**<br>(0.305)  | 1.520*<br>(0.286)   | 1.411+<br>(0.267)   | 1.412+<br>(0.268)   | 1.403+<br>(0.264)    | 1.370+<br>(0.260)   | 1.344<br>(0.261)   | 1.289<br>(0.253)   |
| <i>Net Worth</i>            |        |     |                     |                     |                     |                     |                      |                     |                    |                    |
| 1st Quartile                |        |     |                     | 3.159***<br>(0.544) | 1.963***<br>(0.358) | 1.949***<br>(0.357) | 1.935***<br>(0.354)  | 1.907***<br>(0.352) | 1.445+<br>(0.268)  | 1.386+<br>(0.260)  |
| 2nd Quartile                |        |     |                     | 2.096***<br>(0.330) | 1.388+<br>(0.230)   | 1.394*<br>(0.231)   | 1.372+<br>(0.228)    | 1.371+<br>(0.228)   | 1.082<br>(0.181)   | 1.067<br>(0.179)   |
| 3rd Quartile                |        |     |                     | 1.059<br>(0.181)    | 0.876<br>(0.155)    | 0.887<br>(0.158)    | 0.870<br>(0.154)     | 0.871<br>(0.155)    | 0.769<br>(0.140)   | 0.772<br>(0.141)   |
| <i>Education</i>            |        |     |                     |                     |                     |                     |                      |                     |                    |                    |
| HGC < 12 years              |        |     |                     |                     | 6.083***<br>(0.932) | 5.863***<br>(0.898) | 5.915***<br>(0.923)  | 6.029***<br>(0.924) | 1.492*<br>(0.250)  | 1.420*<br>(0.241)  |
| HGC = 12 years              |        |     |                     |                     | 3.331***<br>(0.474) | 3.243***<br>(0.462) | 3.279***<br>(0.471)  | 3.339***<br>(0.476) | 1.186<br>(0.178)   | 1.154<br>(0.174)   |
| 12 < HGC < 16 years         |        |     |                     |                     | 1.645**<br>(0.262)  | 1.637**<br>(0.261)  | 1.622**<br>(0.260)   | 1.638**<br>(0.261)  | 0.886<br>(0.147)   | 0.868<br>(0.145)   |
| <b>Augmented variables</b>  |        |     |                     |                     |                     |                     |                      |                     |                    |                    |
| <i>ACEs</i>                 |        |     |                     |                     |                     |                     |                      |                     |                    |                    |
| Fair or poor health         |        |     |                     |                     |                     | 1.430*<br>(0.216)   |                      |                     |                    | 1.322+<br>(0.201)  |
| Hospitalized ≥ 2 weeks      |        |     |                     |                     |                     | 1.007<br>(0.136)    |                      |                     |                    | 0.939<br>(0.128)   |
| Confined to home or bed for |        |     |                     |                     |                     | 1.279               |                      |                     |                    | 1.204              |

|                                                         | Simple |      |      |      |      | Standard Regressors           |                  |                   |                     |                     | Augmented Regressors |  |  |  |  |
|---------------------------------------------------------|--------|------|------|------|------|-------------------------------|------------------|-------------------|---------------------|---------------------|----------------------|--|--|--|--|
|                                                         | (1)    | (2)  | (3)  | (4)  | (5)  | (6)                           | (7)              | (8)               | (9)                 | (10)                |                      |  |  |  |  |
| ≥                                                       |        |      |      |      |      | (0.233)                       |                  |                   |                     | (0.224)             |                      |  |  |  |  |
| 4 weeks                                                 |        |      |      |      |      |                               |                  |                   |                     |                     |                      |  |  |  |  |
| Lived with someone depressed, mentally ill, or suicidal |        |      |      |      |      | 0.756<br>(0.146)              |                  |                   |                     | 0.778<br>(0.160)    |                      |  |  |  |  |
| Lived with problem drinker or alcoholic                 |        |      |      |      |      | 0.821 <sup>+</sup><br>(0.089) |                  |                   |                     | 0.896<br>(0.101)    |                      |  |  |  |  |
| Physically harmed by parent or adult more than once     |        |      |      |      |      | 0.857<br>(0.118)              |                  |                   |                     | 0.849<br>(0.121)    |                      |  |  |  |  |
| Little to no love from parent                           |        |      |      |      |      | 1.226 <sup>+</sup><br>(0.131) |                  |                   |                     | 1.119<br>(0.124)    |                      |  |  |  |  |
| Smoked at least 100 cigarettes in lifetime              |        |      |      |      |      |                               | 1.104<br>(0.091) |                   |                     | 1.093<br>(0.092)    |                      |  |  |  |  |
| Emotional disorder or depression                        |        |      |      |      |      |                               |                  | 1.234*<br>(0.116) |                     | 1.296*<br>(0.131)   |                      |  |  |  |  |
| 1980 Armed Forces Qualification Test Score              |        |      |      |      |      |                               |                  |                   | 0.959***<br>(0.003) | 0.960***<br>(0.003) |                      |  |  |  |  |
| N                                                       | 8021   | 8021 | 8021 | 8021 | 8021 | 8021                          | 8021             | 8021              | 8021                | 8021                |                      |  |  |  |  |
| N (FI)                                                  | 573    | 573  | 573  | 573  | 573  | 573                           | 573              | 573               | 573                 | 573                 |                      |  |  |  |  |
| N (NI)                                                  | 7448   | 7448 | 7448 | 7448 | 7448 | 7448                          | 7448             | 7448              | 7448                | 7448                |                      |  |  |  |  |

Note. Odds ratios with robust standard errors in parentheses. Missing data imputed using multiple imputation by chained equations. All models, except Model 1, include fixed effects for type of city at baseline, region at baseline, type of city at year of survey, and region at year of survey. <sup>+</sup>  $p < 0.10$ , \*  $p < 0.05$ , \*\*  $p < .01$ , \*\*\*  $p < .001$

Table 3

*Generalized Logistic Regressions Normal, CIND, and Dementia*

|                                                     | Standard Regressors |                     |                          |                     |                     | Augmented Regressors |                     |                     |                     |                   |
|-----------------------------------------------------|---------------------|---------------------|--------------------------|---------------------|---------------------|----------------------|---------------------|---------------------|---------------------|-------------------|
|                                                     | Simple              |                     | Panel A. CIND vs. Normal |                     |                     |                      |                     |                     |                     |                   |
|                                                     | (1)                 | (2)                 | (3)                      | (4)                 | (5)                 | (6)                  | (7)                 | (8)                 | (9)                 | (10)              |
| Incarcerated prior to<br>Cognition Survey           | 2.403***<br>(0.276) | 1.744***<br>(0.215) | 1.693***<br>(0.210)      | 1.348*<br>(0.171)   | 0.993<br>(0.130)    | 0.995<br>(0.130)     | 0.976<br>(0.128)    | 0.972<br>(0.127)    | 0.917<br>(0.122)    | 0.886<br>(0.119)  |
| Incarcerated in the year of<br>the Cognition Survey | 1.117<br>(0.370)    | 0.959<br>(0.327)    | 0.984<br>(0.336)         | 0.896<br>(0.300)    | 0.905<br>(0.317)    | 0.964<br>(0.338)     | 0.901<br>(0.315)    | 0.901<br>(0.317)    | 0.916<br>(0.321)    | 0.959<br>(0.336)  |
| Age at Interview                                    | 1.041*<br>(0.019)   | 1.040*<br>(0.019)   | 1.040*<br>(0.019)        | 1.037+<br>(0.020)   | 1.041*<br>(0.020)   | 1.045*<br>(0.020)    | 1.041*<br>(0.020)   | 1.041*<br>(0.020)   | 1.036+<br>(0.021)   | 1.039+<br>(0.021) |
| Non-Hispanic Black                                  | 3.364***<br>(0.301) | 3.343***<br>(0.307) | 2.655***<br>(0.252)      | 2.550***<br>(0.246) | 2.486***<br>(0.241) | 2.573***<br>(0.247)  | 2.627***<br>(0.253) | 1.255*<br>(0.128)   | 1.284*<br>(0.133)   |                   |
| Hispanic                                            | 2.975***<br>(0.306) | 3.110***<br>(0.326) | 2.672***<br>(0.285)      | 2.216***<br>(0.243) | 2.153***<br>(0.238) | 2.239***<br>(0.246)  | 2.251***<br>(0.247) | 1.321*<br>(0.152)   | 1.333*<br>(0.155)   |                   |
| Female                                              | 0.795**<br>(0.059)  | 0.758***<br>(0.057) | 0.736***<br>(0.057)      | 0.783**<br>(0.061)  | 0.787**<br>(0.062)  | 0.786**<br>(0.061)   | 0.761***<br>(0.061) | 0.702***<br>(0.056) | 0.686***<br>(0.056) |                   |
| <i>BMI</i>                                          |                     |                     |                          |                     |                     |                      |                     |                     |                     |                   |
| Underweight: BMI < 18.5                             | 1.359<br>(0.494)    | 1.168<br>(0.444)    | 0.949<br>(0.384)         | 0.915<br>(0.370)    | 0.950<br>(0.383)    | 0.938<br>(0.378)     | 1.033<br>(0.448)    | 1.019<br>(0.436)    |                     |                   |
| Overweight: 25 ≤ BMI < 30                           | 0.669***<br>(0.063) | 0.661***<br>(0.064) | 0.664***<br>(0.065)      | 0.661***<br>(0.065) | 0.668***<br>(0.065) | 0.666***<br>(0.065)  | 0.655***<br>(0.066) | 0.658***<br>(0.066) |                     |                   |
| Obese: BMI ≥ 30                                     | 0.655***<br>(0.069) | 0.624***<br>(0.066) | 0.625***<br>(0.067)      | 0.623***<br>(0.067) | 0.632***<br>(0.068) | 0.626***<br>(0.067)  | 0.618***<br>(0.067) | 0.625***<br>(0.068) |                     |                   |
| <i>Reported diagnoses by<br/>Health 50+ survey</i>  |                     |                     |                          |                     |                     |                      |                     |                     |                     |                   |
| Heart problems                                      | 1.071<br>(0.137)    | 0.986<br>(0.128)    | 0.920<br>(0.122)         | 0.903<br>(0.122)    | 0.916<br>(0.122)    | 0.884<br>(0.119)     | 0.922<br>(0.127)    | 0.870<br>(0.124)    |                     |                   |

|                            | Simple |     |                     | Standard Regressors |                     |                     | Augmented Regressors |                     |                    |                    |
|----------------------------|--------|-----|---------------------|---------------------|---------------------|---------------------|----------------------|---------------------|--------------------|--------------------|
|                            | (1)    | (2) | (3)                 | (4)                 | (5)                 | (6)                 | (7)                  | (8)                 | (9)                | (10)               |
| High blood pressure        |        |     | 1.329***<br>(0.110) | 1.305***<br>(0.109) | 1.284**<br>(0.109)  | 1.286**<br>(0.110)  | 1.282**<br>(0.109)   | 1.269**<br>(0.108)  | 1.291**<br>(0.112) | 1.274**<br>(0.111) |
| Diabetes                   |        |     | 1.289*<br>(0.131)   | 1.232*<br>(0.126)   | 1.246*<br>(0.129)   | 1.231*<br>(0.128)   | 1.246*<br>(0.129)    | 1.228*<br>(0.127)   | 1.228+<br>(0.130)  | 1.199+<br>(0.128)  |
| Stroke                     |        |     | 1.667**<br>(0.304)  | 1.523*<br>(0.285)   | 1.425+<br>(0.268)   | 1.420+<br>(0.268)   | 1.416+<br>(0.266)    | 1.385+<br>(0.261)   | 1.353<br>(0.261)   | 1.297<br>(0.252)   |
| <i>Net Worth</i>           |        |     |                     |                     |                     |                     |                      |                     |                    |                    |
| 1st Quartile               |        |     |                     | 3.153***<br>(0.542) | 1.956***<br>(0.356) | 1.945***<br>(0.355) | 1.929***<br>(0.352)  | 1.899***<br>(0.349) | 1.441+<br>(0.265)  | 1.384+<br>(0.257)  |
| 2nd Quartile               |        |     |                     | 2.097***<br>(0.329) | 1.391*<br>(0.230)   | 1.398*<br>(0.231)   | 1.375+<br>(0.227)    | 1.374+<br>(0.227)   | 1.082<br>(0.179)   | 1.069<br>(0.178)   |
| 3rd Quartile               |        |     |                     | 1.059<br>(0.181)    | 0.875<br>(0.155)    | 0.887<br>(0.158)    | 0.869<br>(0.154)     | 0.871<br>(0.155)    | 0.767<br>(0.139)   | 0.770<br>(0.140)   |
| <i>Education</i>           |        |     |                     |                     |                     |                     |                      |                     |                    |                    |
| HGC < 12 years             |        |     |                     |                     | 6.059***<br>(0.928) | 5.839***<br>(0.895) | 5.899***<br>(0.921)  | 6.003***<br>(0.921) | 1.491*<br>(0.248)  | 1.422*<br>(0.240)  |
| HGC = 12 years             |        |     |                     |                     | 3.330***<br>(0.474) | 3.242***<br>(0.462) | 3.282***<br>(0.470)  | 3.336***<br>(0.475) | 1.185<br>(0.177)   | 1.155<br>(0.173)   |
| 12 < HGC < 16 years        |        |     |                     |                     | 1.642**<br>(0.262)  | 1.635**<br>(0.261)  | 1.621**<br>(0.260)   | 1.635**<br>(0.260)  | 0.883<br>(0.146)   | 0.867<br>(0.145)   |
| <b>Augmented variables</b> |        |     |                     |                     |                     |                     |                      |                     |                    |                    |
| <i>ACEs</i>                |        |     |                     |                     |                     | 1.432*<br>(0.216)   |                      |                     |                    | 1.327+<br>(0.203)  |
| Fair or poor health        |        |     |                     |                     |                     |                     |                      |                     |                    |                    |
| Hospitalized ≥ 2 weeks     |        |     |                     |                     |                     | 1.016<br>(0.137)    |                      |                     |                    | 0.940<br>(0.128)   |

|                                                         | Simple |     |     | Standard Regressors |     |                               | Augmented Regressors |                               |                                 |                                 |
|---------------------------------------------------------|--------|-----|-----|---------------------|-----|-------------------------------|----------------------|-------------------------------|---------------------------------|---------------------------------|
|                                                         | (1)    | (2) | (3) | (4)                 | (5) | (6)                           | (7)                  | (8)                           | (9)                             | (10)                            |
| Confined to home or bed for ≥ 4 weeks                   |        |     |     |                     |     | 1.283<br>(0.234)              |                      |                               |                                 | 1.215<br>(0.228)                |
| Lived with someone depressed, mentally ill, or suicidal |        |     |     |                     |     | 0.757<br>(0.147)              |                      |                               |                                 | 0.782<br>(0.160)                |
| Lived with problem drinker or alcoholic                 |        |     |     |                     |     | 0.829 <sup>+</sup><br>(0.089) |                      |                               |                                 | 0.902<br>(0.101)                |
| Physically harmed by parent or adult more than once     |        |     |     |                     |     | 0.846<br>(0.116)              |                      |                               |                                 | 0.836<br>(0.118)                |
| Little to no love from parent                           |        |     |     |                     |     | 1.227 <sup>+</sup><br>(0.131) |                      |                               |                                 | 1.122<br>(0.124)                |
| Smoked at least 100 cigarettes in lifetime              |        |     |     |                     |     |                               | 1.098<br>(0.091)     |                               |                                 | 1.084<br>(0.091)                |
| Emotional disorder or depression                        |        |     |     |                     |     |                               |                      | 1.230 <sup>*</sup><br>(0.115) |                                 | 1.289 <sup>*</sup><br>(0.128)   |
| 1980 Armed Forces Qualification Test Score              |        |     |     |                     |     |                               |                      |                               | 0.959 <sup>***</sup><br>(0.003) | 0.960 <sup>***</sup><br>(0.003) |

|                                                     | Standard Regressors |                     |                     |                     |                     | Augmented Regressors |                     |                     |                     |                     |
|-----------------------------------------------------|---------------------|---------------------|---------------------|---------------------|---------------------|----------------------|---------------------|---------------------|---------------------|---------------------|
|                                                     | (1)                 | (2)                 | (3)                 | (4)                 | (5)                 | (6)                  | (7)                 | (8)                 | (9)                 | (10)                |
| Panel B. Dementia vs. CIND and Normal               |                     |                     |                     |                     |                     |                      |                     |                     |                     |                     |
| Incarcerated prior to<br>Cognition Survey           | 2.683***<br>(0.662) | 1.843*<br>(0.490)   | 1.762*<br>(0.470)   | 1.323<br>(0.360)    | 0.955<br>(0.270)    | 0.957<br>(0.276)     | 0.939<br>(0.269)    | 0.933<br>(0.267)    | 0.915<br>(0.258)    | 0.881<br>(0.258)    |
| Incarcerated in the year of<br>the Cognition Survey | 0.966<br>(0.720)    | 0.831<br>(0.638)    | 0.791<br>(0.605)    | 0.674<br>(0.517)    | 0.733<br>(0.564)    | 0.822<br>(0.641)     | 0.733<br>(0.565)    | 0.733<br>(0.565)    | 0.755<br>(0.578)    | 0.835<br>(0.645)    |
| Age at Interview                                    |                     | 1.137***<br>(0.042) | 1.135***<br>(0.042) | 1.136***<br>(0.044) | 1.146***<br>(0.045) | 1.150***<br>(0.045)  | 1.146***<br>(0.045) | 1.146***<br>(0.045) | 1.145***<br>(0.045) | 1.148***<br>(0.046) |
| Non-Hispanic Black                                  |                     | 5.345***<br>(1.357) | 5.459***<br>(1.391) | 4.050***<br>(1.040) | 3.865***<br>(0.999) | 3.832***<br>(1.027)  | 3.910***<br>(1.023) | 3.985***<br>(1.068) | 2.002*<br>(0.550)   | 2.103*<br>(0.610)   |
| Hispanic                                            |                     | 5.098***<br>(1.500) | 5.537***<br>(1.651) | 4.466***<br>(1.327) | 3.634***<br>(1.097) | 3.575***<br>(1.104)  | 3.684***<br>(1.115) | 3.693***<br>(1.124) | 2.203*<br>(0.675)   | 2.268***<br>(0.716) |
| Female                                              |                     | 0.812<br>(0.145)    | 0.772<br>(0.140)    | 0.728+<br>(0.134)   | 0.787<br>(0.143)    | 0.793<br>(0.146)     | 0.792<br>(0.144)    | 0.767<br>(0.141)    | 0.728+<br>(0.132)   | 0.716+<br>(0.133)   |
| <i>BMI</i>                                          |                     |                     |                     |                     |                     |                      |                     |                     |                     |                     |
| Underweight: BMI < 18.5                             |                     | 1.760<br>(1.379)    | 1.557<br>(1.232)    | 1.241<br>(1.005)    | 1.158<br>(0.946)    | 1.242<br>(1.008)     | 1.228<br>(1.005)    | 1.361<br>(1.100)    | 1.299<br>(1.067)    |                     |
| Overweight: 25 ≤ BMI < 30                           |                     | 0.548**<br>(0.121)  | 0.557**<br>(0.125)  | 0.575*<br>(0.131)   | 0.565*<br>(0.129)   | 0.580*<br>(0.131)    | 0.579*<br>(0.132)   | 0.575*<br>(0.131)   | 0.573*<br>(0.131)   |                     |
| Obese: BMI ≥ 30                                     |                     | 0.473**<br>(0.114)  | 0.464**<br>(0.114)  | 0.478**<br>(0.117)  | 0.468**<br>(0.116)  | 0.484**<br>(0.120)   | 0.480**<br>(0.119)  | 0.481**<br>(0.119)  | 0.478**<br>(0.121)  |                     |
| <i>Reported diagnoses by Health 50+ survey</i>      |                     |                     |                     |                     |                     |                      |                     |                     |                     |                     |
| Heart problems                                      |                     | 1.161<br>(0.339)    | 1.045<br>(0.306)    | 1.019<br>(0.300)    | 1.001<br>(0.302)    | 1.015<br>(0.299)     | 0.980<br>(0.295)    | 1.011<br>(0.299)    | 0.958<br>(0.296)    |                     |
| High blood pressure                                 |                     | 1.417+<br>(0.258)   | 1.369+<br>(0.255)   | 1.327<br>(0.245)    | 1.325<br>(0.245)    | 1.327<br>(0.245)     | 1.311<br>(0.243)    | 1.332<br>(0.249)    | 1.313<br>(0.245)    |                     |
| Diabetes                                            |                     | 1.349               | 1.254               | 1.205               | 1.202               | 1.204                | 1.185               | 1.181               | 1.161               |                     |

|                                                               | Simple |     |                  | Standard Regressors |                     |                     | Augmented Regressors |                     |                  |                  |
|---------------------------------------------------------------|--------|-----|------------------|---------------------|---------------------|---------------------|----------------------|---------------------|------------------|------------------|
|                                                               | (1)    | (2) | (3)              | (4)                 | (5)                 | (6)                 | (7)                  | (8)                 | (9)              | (10)             |
| Stroke                                                        |        |     | 1.851<br>(0.698) | 1.747<br>(0.665)    | 1.631<br>(0.617)    | 1.575<br>(0.622)    | 1.619<br>(0.619)     | 1.585<br>(0.603)    | 1.539<br>(0.585) | 1.431<br>(0.572) |
| <i>Net Worth</i>                                              |        |     |                  |                     |                     |                     |                      |                     |                  |                  |
| 1st Quartile                                                  |        |     |                  | 4.517**<br>(2.196)  | 2.541+<br>(1.304)   | 2.484+<br>(1.280)   | 2.498+<br>(1.289)    | 2.466+<br>(1.272)   | 1.872<br>(0.969) | 1.762<br>(0.918) |
| 2nd Quartile                                                  |        |     |                  | 2.624*<br>(1.236)   | 1.622<br>(0.800)    | 1.625<br>(0.800)    | 1.601<br>(0.793)     | 1.605<br>(0.792)    | 1.275<br>(0.637) | 1.254<br>(0.627) |
| 3rd Quartile                                                  |        |     |                  | 0.873<br>(0.549)    | 0.696<br>(0.449)    | 0.705<br>(0.452)    | 0.691<br>(0.446)     | 0.692<br>(0.447)    | 0.621<br>(0.407) | 0.622<br>(0.405) |
| <i>Education</i>                                              |        |     |                  |                     |                     |                     |                      |                     |                  |                  |
| HGC < 12 years                                                |        |     |                  |                     | 7.810***<br>(3.812) | 7.622***<br>(3.762) | 7.596***<br>(3.695)  | 7.724***<br>(3.763) | 2.039<br>(1.049) | 1.967<br>(1.014) |
| HGC = 12 years                                                |        |     |                  |                     | 4.113**<br>(1.986)  | 4.010**<br>(1.948)  | 4.057**<br>(1.955)   | 4.119**<br>(1.986)  | 1.479<br>(0.751) | 1.446<br>(0.735) |
| 12 < HGC < 16 years                                           |        |     |                  |                     | 1.437<br>(0.794)    | 1.442<br>(0.806)    | 1.416<br>(0.779)     | 1.432<br>(0.789)    | 0.791<br>(0.441) | 0.783<br>(0.438) |
| <b>Augmented variables</b>                                    |        |     |                  |                     |                     |                     |                      |                     |                  |                  |
| <i>ACEs</i>                                                   |        |     |                  |                     |                     |                     |                      |                     |                  |                  |
| Fair or poor health                                           |        |     |                  |                     | 1.513<br>(0.484)    |                     |                      |                     | 1.442<br>(0.466) |                  |
| Hospitalized ≥ 2 weeks                                        |        |     |                  |                     | 1.151<br>(0.387)    |                     |                      |                     | 1.057<br>(0.357) |                  |
| Confined to home or bed for<br>≥ 4 weeks                      |        |     |                  |                     | 1.103<br>(0.505)    |                     |                      |                     | 1.043<br>(0.476) |                  |
| Lived with someone<br>depressed, mentally ill, or<br>suicidal |        |     |                  |                     | 0.990<br>(0.451)    |                     |                      |                     | 1.024<br>(0.473) |                  |



|                                                     | Simple |      |      |      |      | Standard Regressors |                  |                  |                     |      | Augmented Regressors |      |      |                     |  |
|-----------------------------------------------------|--------|------|------|------|------|---------------------|------------------|------------------|---------------------|------|----------------------|------|------|---------------------|--|
|                                                     | (1)    | (2)  | (3)  | (4)  | (5)  | (6)                 | (7)              | (8)              | (9)                 | (10) | (11)                 | (12) | (13) | (14)                |  |
| Lived with problem drinker or alcoholic             |        |      |      |      |      | 0.828<br>(0.237)    |                  |                  |                     |      |                      |      |      |                     |  |
| Physically harmed by parent or adult more than once |        |      |      |      |      | 0.700<br>(0.245)    |                  |                  |                     |      |                      |      |      | 0.704<br>(0.247)    |  |
| Little to no love from parent                       |        |      |      |      |      | 1.219<br>(0.285)    |                  |                  |                     |      |                      |      |      | 1.127<br>(0.266)    |  |
| Smoked at least 100 cigarettes in lifetime          |        |      |      |      |      |                     | 1.109<br>(0.221) |                  |                     |      |                      |      |      | 1.097<br>(0.225)    |  |
| Emotional disorder or depression                    |        |      |      |      |      |                     |                  | 1.222<br>(0.274) |                     |      |                      |      |      | 1.264<br>(0.299)    |  |
| 1980 Armed Forces Qualification Test Score          |        |      |      |      |      |                     |                  |                  | 0.960***<br>(0.007) |      |                      |      |      | 0.961***<br>(0.007) |  |
| N                                                   | 8021   | 8021 | 8021 | 8021 | 8021 | 8021                | 8021             | 8021             | 8021                | 8021 | 8021                 | 8021 | 8021 | 8021                |  |
| N (FI)                                              | 573    | 573  | 573  | 573  | 573  | 573                 | 573              | 573              | 573                 | 573  | 573                  | 573  | 573  | 573                 |  |
| N (NI)                                              | 7448   | 7448 | 7448 | 7448 | 7448 | 7448                | 7448             | 7448             | 7448                | 7448 | 7448                 | 7448 | 7448 | 7448                |  |

Note. Reported odds ratios with robust standard errors in parentheses. Missing data imputed using multiple imputation by chained equations. All models except the simple regression include fixed effects for type of city at baseline, region at baseline, type of city at year of survey, and region at year of survey.

+  $p < 0.10$ , \*  $p < 0.05$ , \*\*  $p < .01$ , \*\*\*  $p < .001$

Table 4

*Overall Summary Statistics*

| <b>Variables</b>                                        | <b>Mean</b>       | <b>Range</b> |            |
|---------------------------------------------------------|-------------------|--------------|------------|
|                                                         |                   | <b>Min</b>   | <b>Max</b> |
| <i>Incarceration</i>                                    |                   |              |            |
| Incarcerated Prior to or During 48+ Cognition Module    | .0714<br>(.003)   | 0            | 1          |
| Incarcerated Prior to 48+ Cognition Module              | .071<br>(.003)    | 0            | 1          |
| Incarcerated in the year of the Cognition Survey        | 0.007<br>(0.001)  | 0            | 1          |
| <i>Demographics</i>                                     |                   |              |            |
| Age at Interview                                        | 48.328<br>(0.021) | 46           | 60         |
| Non-Hispanic Black                                      | 0.312<br>(0.007)  | 0            | 1          |
| Hispanic                                                | 0.194<br>(0.005)  | 0            | 1          |
| Female                                                  | 0.509<br>(0.008)  | 0            | 1          |
| <i>ACEs</i>                                             |                   |              |            |
| Fair or poor health                                     | 0.051<br>(0.003)  | 0            | 1          |
| Hospitalized $\geq$ 2 weeks                             | 0.086<br>(0.003)  | 0            | 1          |
| Confined to home or bed for $\geq$ 4 weeks              | 0.048<br>(0.002)  | 0            | 1          |
| Lived with someone depressed, mentally ill, or suicidal | 0.071<br>(0.003)  | 0            | 1          |
| Lived with problem drinker or alcoholic                 | 0.184<br>(0.004)  | 0            | 1          |
| Physically harmed by parent or adult more               | 0.111             | 0            | 1          |

| <b>Variables</b>                               | <b>Mean</b>      | <b>Range</b> |            |
|------------------------------------------------|------------------|--------------|------------|
|                                                |                  | <b>Min</b>   | <b>Max</b> |
| than once                                      | (0.004)          |              |            |
| Little to no love from parent                  | 0.180<br>(0.004) | 0            | 1          |
| <i>BMI</i>                                     |                  |              |            |
| Normal weight: $18.5 \leq \text{BMI} < 25$     | 0.245<br>(0.005) | 0            | 1          |
| Underweight: $\text{BMI} < 18.5$               | 0.008<br>(0.001) | 0            | 1          |
| Overweight: $25 \leq \text{BMI} < 30$          | 0.382<br>(0.005) | 0            | 1          |
| Obese: $\text{BMI} \geq 30$                    | 0.365<br>(0.005) | 0            | 1          |
| Heart problems                                 | 0.082<br>(0.003) | 0            | 1          |
| <i>Reported Diagnosis by Health 50+ Survey</i> |                  |              |            |
| High blood pressure                            | 0.383<br>(0.006) | 0            | 1          |
| Diabetes                                       | 0.146<br>(0.004) | 0            | 1          |
| Stroke                                         | 0.031<br>(0.002) | 0            | 1          |
| Emotional disorder or depression               | 0.197<br>(0.005) | 0            | 1          |
| Smoked 100 cigarettes during lifetime          | 0.581<br>(0.006) | 0            | 1          |
| <i>Education</i>                               |                  |              |            |
| HGC < 12 years                                 | 0.159<br>(0.004) | 0            | 1          |
| HGC = 12 years                                 | 0.376<br>(0.006) | 0            | 1          |
| 12 < HGC < 16 years                            | 0.241            | 0            | 1          |

| Variables                                        | Mean              | Range |     |
|--------------------------------------------------|-------------------|-------|-----|
|                                                  |                   | Min   | Max |
|                                                  | (0.005)           |       |     |
| HGC $\geq$ 16 years                              | 0.224<br>(0.005)  | 0     | 1   |
| 1980 Armed Forces Qualification Test Score       | 40.773<br>(0.364) | 0     | 100 |
| <i>Net Worth</i>                                 |                   |       |     |
| 1st Quartile                                     | 0.245<br>(0.005)  | 0     | 1   |
| 2nd Quartile                                     | 0.257<br>(0.005)  | 0     | 1   |
| 3rd Quartile                                     | 0.254<br>(0.005)  | 0     | 1   |
| 4th Quartile                                     | 0.245<br>(0.006)  | 0     | 1   |
| <i>Cognition outcomes</i>                        |                   |       |     |
| TICS-m Score                                     | 16.393<br>(0.053) | .0756 | 27  |
| Impaired                                         | 0.135<br>(0.004)  | 0     | 1   |
| <i>No Cognitive Impairment, CIND or Dementia</i> |                   |       |     |
| Normal                                           | 0.865<br>(0.004)  | 0     | 1   |
| CIND                                             | 0.115<br>(0.004)  | 0     | 1   |
| Dementia                                         | 0.020<br>(0.002)  | 0     | 1   |
| N                                                | 8021              |       |     |
| N (FI)                                           | 573               |       |     |
| N (NI)                                           | 7448              |       |     |

*Note.* The range is the range over all imputed data sets.
